# Supplementary material
Source: PubMed Central journal article supplement (PMC6376263)

Sup. Fig 1A

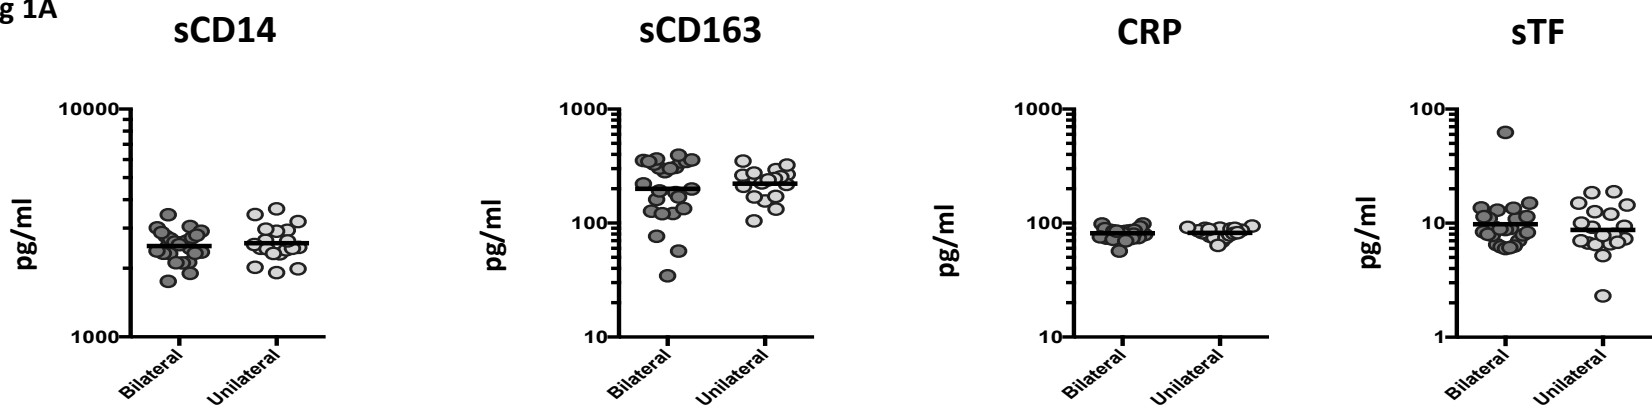

Sup. Fig 1B

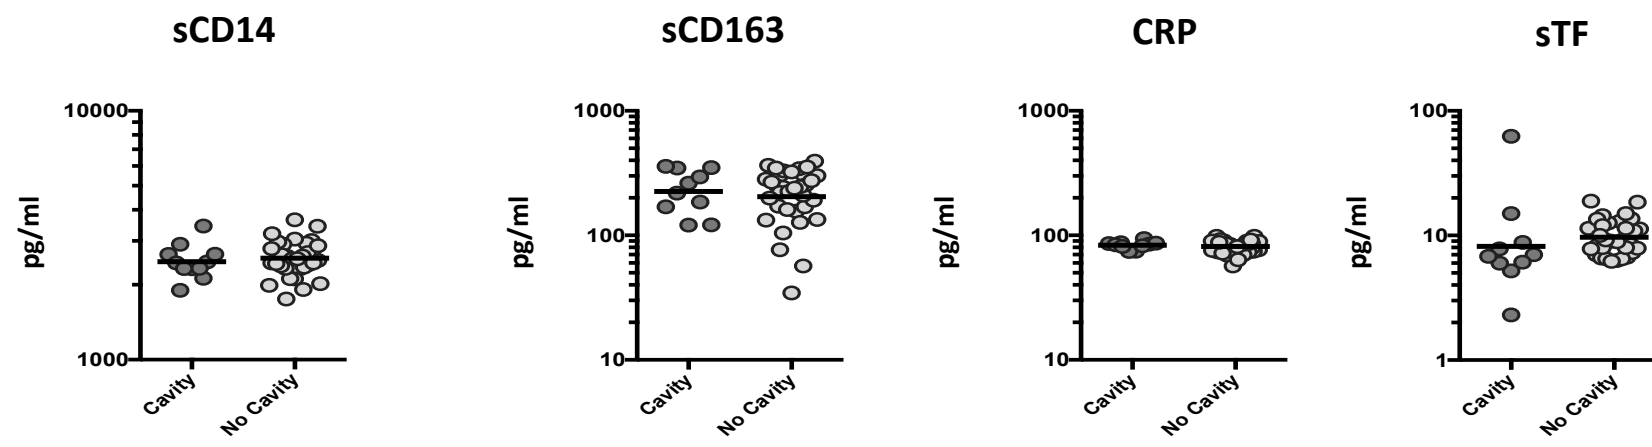

Sup. Fig 1C

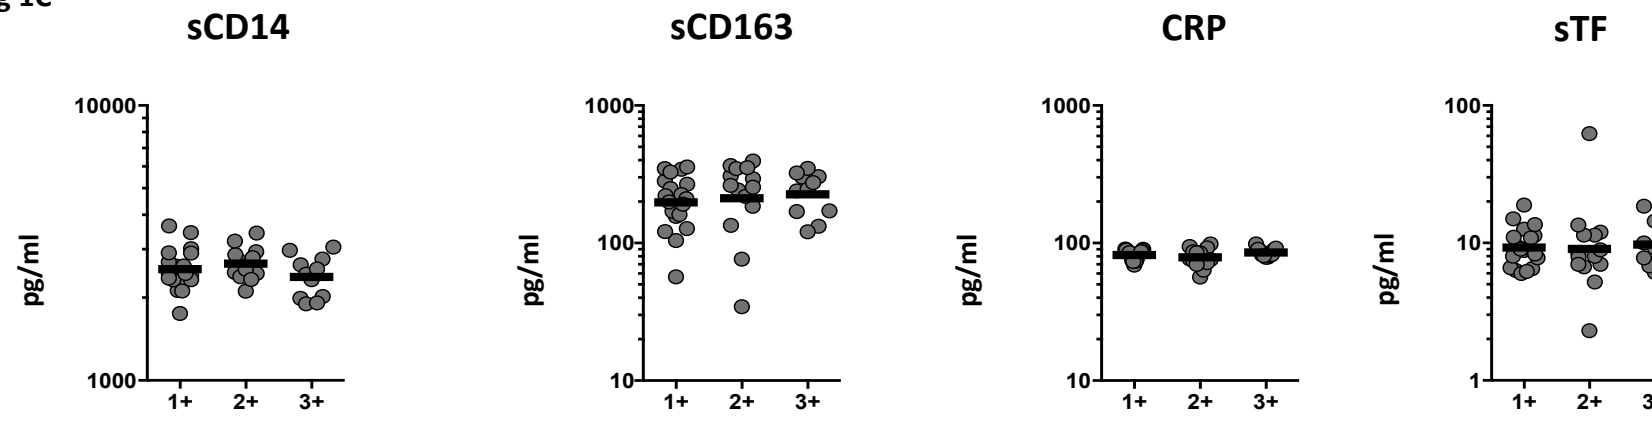

Supplement: IMM-156-249-s001.pdf [file IMM-156-249-s001.pdf]
